# Supplementary material for: Integrated linker-regulation and ring-fusion engineering for efficient additive-free non-fullerene organic solar cells
Source: Royal Society of Chemistry journal article supplement (doi:10.1039/d0tc02499f), 2020-01-01
Supplement: d0tc02499f1.pdf [file d0tc02499f1.pdf]

**Supporting information for**

**Integrated Linker-Regulation and Ring-Fusion Engineering towards**

**Efficient Additive-Free Non-Fullerene Organic Solar cells**

Yuli Yin,<sup>#a,c</sup> Wenxia Zhang,<sup>#b</sup> Zhi Zheng,<sup>a</sup> Ziyi Ge,<sup>b\*</sup> Yi Liu,<sup>c\*</sup> Fengyun Guo,<sup>a</sup> Shiyong Gao,<sup>a</sup>

Liancheng Zhao,<sup>a</sup> Yong Zhang<sup>a,d\*</sup>

<sup>a</sup> *School of Materials Science and Engineering, Harbin Institute of Technology, Harbin 150001, China. Email: yongzhang@hit.edu.cn*

<sup>b</sup> *Ningbo Institute of Materials Technology and Engineering, Chinese Academy of Sciences, Ningbo, 315201, China. Email: geziyi@nimte.ac.cn*

<sup>c</sup> *The Molecular Foundry, Lawrence Berkeley National Laboratory, Berkeley, California 94720, United States. E-mail: yliu@lbl.gov*

<sup>d</sup> *School of Materials Science and Engineering, Zhengzhou University, Zhengzhou 450001, China*

<sup>#</sup> Both authors contributed equally.

## Experimental section

**Materials.** Monomer FPDI-Br was synthesized according to our previous work.<sup>1,2</sup> 2,5-bis(trimethylstannyl)thiophene, and 2,5-Bis(trimethylstannyl)thieno[3,2-b]thiophene were obtained from Derthon Optoelectronic Materials Science Technology Co LTD. PTB7-Th was purchased from Solarmer Materials (Beijing) Inc. All chemicals were obtained from commercial sources and used without further purification unless otherwise specified.

**Synthesis of T-FPDI.** A solution of FPDI-Br (400 mg, 0.27 mmol) and 2,5-bis(trimethylstannyl)thiophene (45.1 mg, 0.11 mmol) monomers in toluene (20 mL) was degassed under N<sub>2</sub> for three time. Then, tris(dibenzylideneacetone)dipalladium(0) (10.1 mg, 0.01 mmol) and tri(o-tolyl)phosphine (20.2 mg, 0.07 mmol) were quickly added, and the mixture solution was refluxed at 110 °C for 12 h under N<sub>2</sub> protection. After cooling to room temperature, the resultant solution was removed by rotary evaporation and the crude product was purified by column chromatography on silica gel (petroleum ether/dichloromethane, 2:1 to 1:2, v/v) to yield dark brown solid T-FPDI (257 mg, 0.09 mmol, 80%). <sup>1</sup>H NMR (400 MHz, CDCl<sub>3</sub>) δ 10.34 (s, 8H), 9.63 – 8.84 (m, 14H), 7.76 (s, 2H), 5.34 (dd, 8H), 2.53 – 2.22 (m, 16H), 2.02 (d, 16H), 1.31 – 1.16 (m, 98H), 0.87 (ddd, 46H). MS (MALDI-TOF): Calcd. For C<sub>192</sub>H<sub>208</sub>N<sub>8</sub>O<sub>16</sub>S (M<sup>+</sup>): 2915.55, Found: 2915.76.

**Synthesis of TT-FPDI.** TT-FPDI was synthesized by a similar method to the one used for T-FPDI with a yield of 78%. <sup>1</sup>H NMR (400 MHz, CDCl<sub>3</sub>) δ 10.36 (s, 8H), 9.53 – 9.14 (m, 14H), 7.88 (s, 2H), 5.42 – 5.28 (m, 8H), 2.39 (s, 16H), 2.02 (d, 16H), 1.31 (dd, 98H), 0.91 – 0.80 (m, 46H). MS (MALDI-TOF): Calcd. For C<sub>194</sub>H<sub>208</sub>N<sub>8</sub>O<sub>16</sub>S<sub>2</sub> (M<sup>+</sup>):

2971.52, Found: 2971.75.

**Synthesis of FT-FPDI.** In photocyclization reaction device, T-FPDI (146 mg, 0.05 mmol) and iodine (50.0 mg) were dissolved in 360 mL toluene. Then, the mixture solution was photoirradiated using 450W mercury lamp for 36 h with minimal cooling of the inner jacketed glass tubing. The reaction mixture was terminated until the starting material could not be detected by thin-layer chromatography (TLC). Solvent was removed by rotary evaporation and the residue was purified by column chromatography on silica gel (petroleum ether/dichloromethane, 2:1 to 1:2, v/v) to yield FT-FPDI as dark red solid (118 mg, 0.04 mmol, 81 %).  $^1\text{H}$  NMR (400 MHz,  $\text{CDCl}_3$ )  $\delta$  11.52 (s, 2H), 10.83 (d, 10H), 9.56 (d, 4H), 9.29 (s, 4H), 5.51 (d, 8H), 2.50 (d, 16H), 2.24 – 1.89 (m, 16H), 1.44 – 1.24 (m, 98H), 1.05 – 0.70 (m, 46H). MS (MALDI-TOF): Calcd. For  $\text{C}_{192}\text{H}_{204}\text{N}_8\text{O}_{16}\text{S}$  ( $\text{M}^+$ ): 2911.52, Found: 2913.73.

**Synthesis of FTT-FPDI.** FTT-FPDI was synthesized by a similar method to the one used for FTT-FPDI with a yield of 80%.  $^1\text{H}$  NMR (400 MHz,  $\text{CDCl}_3$ )  $\delta$  10.85 (dd,  $J = 135.6$ , 12H), 9.51 (dd, 4H), 9.29 (s, 4H), 5.46 (t, 8H), 2.87 – 1.92 (m, 32H), 1.57 – 1.19 (m, 98H), 1.17 – 0.60 (m, 46H). MS (MALDI-TOF): Calcd. For  $\text{C}_{194}\text{H}_{204}\text{N}_8\text{O}_{16}\text{S}_2$  ( $\text{M}^+$ ): 2967.49, Found: 2969.74.

### **Characterization**

$^1\text{H}$  NMR spectra were recorded on a Bruker AV 400 spectrometer and used tetramethylsilane (TMS) as an internal standard in  $\text{CDCl}_3$ . MALDI-TOF-MS was performed on Bruker Daltronik GmbH (autoflex II). The UV-Vis spectra of polymers were measured on with a TU-1601 spectrophotometer by using a 1 cm glass cuvette. Cyclic voltammetry (CV) was performed in 0.1M tetrabutylammonium

hexafluorophosphate in acetonitrile at a scan rate of 100 mV/s with ITO as the working electrode, Pt wire as the counter electrode and Ag/Ag<sup>+</sup> as the reference electrode. Atomic force microscopy (AFM) images were obtained using a Veeco Dimension 3100V microscope in the tapping mode. GIWAXS patterns were acquired under X-ray incident angle of 0.14° and X-ray energy of 10 keV at Beamline 7.3.3 of the Advanced Light Source, Lawrence Berkeley National Laboratory.

***Device Fabrication.*** Prepatterned ITO-coated glasses were cleaned by sequential cycles of sonication in soap water, deionized water, ethanol, acetone, and isopropanol for 30 min, respectively. After UV/ozone treatment for 6 min, PEDOT:PSS hole transport layer was filtered and spin-coated on top of the treated-ITO at 4000 rpm for 30 s and dried over 150 °C for 15 min. The active layer solutions were prepared in CB (with a polymer concentration of 8 mg/mL and a D/A ratio at 1:1.5), and spin-coated on the PEDOT:PSS-coated substrates in a glove-box under N<sub>2</sub> atmosphere at 1500 rpm for 45 s to obtain a thickness of ≈ 120 nm. The blend films were then transferred to the heating platform and annealed at 100 °C for 10 min. A thin layer of PDINO (1.5 mg/mL) was spin coated on the top of active layer with 3000 rpm for 60 s. Finally, the Al (100 nm) electrode was evaporated onto the active layer under a vacuum of 10<sup>-5</sup> Torr. Simulated solar light (100 mW cm<sup>2</sup> AM 1.5G) provided by a Newport-Oriel® Sol3A 450 W solar simulator was used to measure the photovoltaic characteristics of the devices under simulated solar light (100 mW cm<sup>2</sup> AM 1.5G). The EQE spectra were determined by a Newport-Oriel® IQE 200™ which was calibrated by a standard Si/Ge solar cell. The thickness of the active layer was investigated using a computer-

controlled Dektak 150 Veeco.

The hole-only device for the hole mobility was fabricated with a device structure of ITO/PEDOT:PSS/PTB7-Th:SMAs/MoO<sub>3</sub>/Al. The electron-only device for the electron mobility was fabricated with a device structure of ITO/Al/PTB7-Th: SMAs/PDINO/Al. Both the hole and electron mobilities by space charge limited current (SCLC) were calculated with the following Mott-Gurney equation in the SCLC region:  $J = (9/8)\epsilon_0\epsilon_r\mu(V^2/L^3)$ , in which  $\epsilon_0$  is the permittivity of the vacuum,  $\epsilon_r$  is the dielectric constant of the polymer and assumed to be 3, and  $L$  is the thickness of active layer.

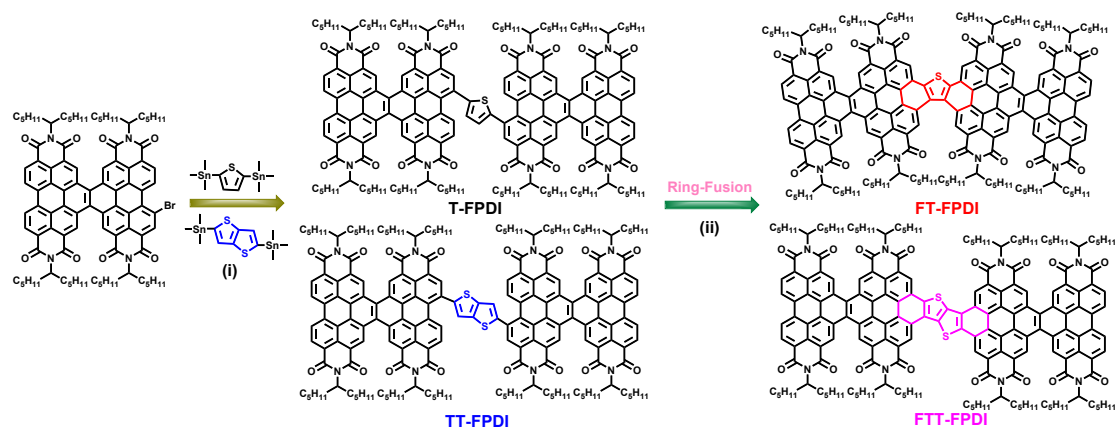

**Scheme S1** Synthetic route of T-FPDI, TT-FPDI, FT-FPDI and FTT-FPDI: (i) toluene, Pd<sub>2</sub>(dba)<sub>3</sub>/P(o-tol)<sub>3</sub>, 110°C, 12h. (ii) Toluene, I<sub>2</sub>, *hν*, 36 h.

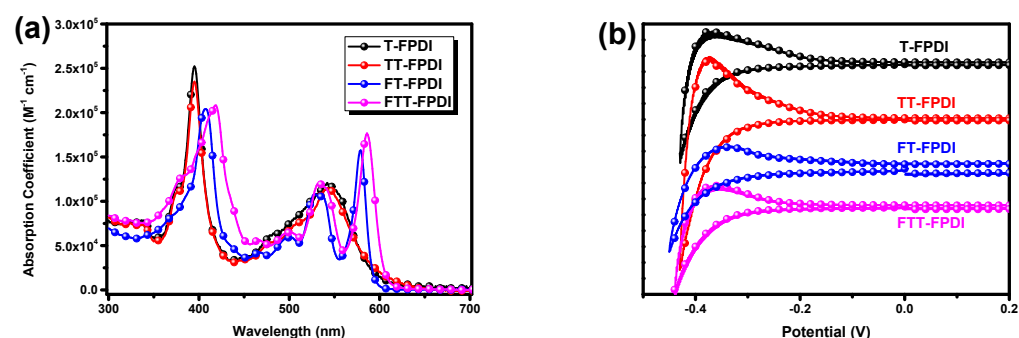

**Fig. S1** (a) The absorption coefficient of four SMAs in CB solution, and (b) the cyclic voltammetry of four SMAs in solid state.

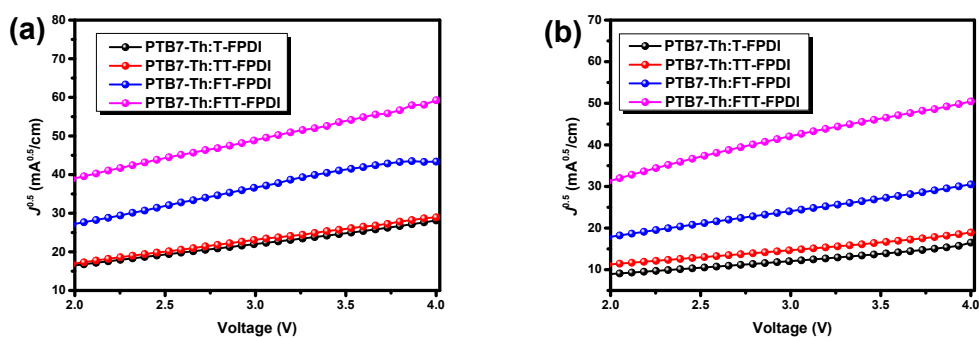

**Fig. S2**  $J^{0.5}$ - $V$  plot for the optimal blend films: (a) hole-only devices; (b) electron-only devices.

**Table S1** The summary devices parameters of NF-OSCs based on four electron acceptors by varying annealing temperature.

| Active layer      | Processing conditions | $V_{oc}$ (V) | $J_{sc}$ (mA/cm <sup>2</sup> ) | FF (%)      | PCE (%)     |
|-------------------|-----------------------|--------------|--------------------------------|-------------|-------------|
| PTB7-Th: T-FPDI   | 80 °C 10 min          | 0.779        | 12.0                           | 48.7        | 4.57        |
| PTB7-Th: T-FPDI   | 100 °C 10 min         | <b>0.780</b> | <b>13.4</b>                    | <b>53.0</b> | <b>5.52</b> |
| PTB7-Th: T-FPDI   | 120 °C 10 min         | 0.782        | 12.3                           | 53.9        | 5.18        |
| PTB7-Th: TT-FPDI  | 80 °C 10 min          | 0.780        | 12.6                           | 54.1        | 5.32        |
| PTB7-Th: TT-FPDI  | 100 °C 10 min         | <b>0.791</b> | <b>14.4</b>                    | <b>62.9</b> | <b>7.17</b> |
| PTB7-Th: TT-FPDI  | 120 °C 10 min         | 0.791        | 13.6                           | 58.4        | 6.27        |
| PTB7-Th: FT-FPDI  | 80 °C 10 min          | 0.808        | 13.2                           | 51.6        | 5.50        |
| PTB7-Th: FT-FPDI  | 100 °C 10 min         | <b>0.805</b> | <b>14.4</b>                    | <b>58.2</b> | <b>6.75</b> |
| PTB7-Th: FT-FPDI  | 120 °C 10 min         | 0.810        | 14.9                           | 55.2        | 6.65        |
| PTB7-Th: FTT-FPDI | 80 °C 10 min          | 0.817        | 14.7                           | 55.9        | 6.73        |
| PTB7-Th: FTT-FPDI | 100 °C 10 min         | <b>0.822</b> | <b>16.5</b>                    | <b>56.4</b> | <b>7.66</b> |
| PTB7-Th: FTT-FPDI | 120 °C 10 min         | 0.813        | 16.7                           | 56.1        | 7.60        |

**Table S2** The summary devices parameters of NF-OSCs based on four electron acceptors under different amounts of DIO.

| Active layer     | Additive (volume) | Thickness (nm) | $V_{oc}$ (V) | $J_{sc}$ (mA/cm <sup>2</sup> ) | FF (%)      | PCE (%)     |
|------------------|-------------------|----------------|--------------|--------------------------------|-------------|-------------|
| PTB7-Th: T-FPDI  | <b>none</b>       | <b>93</b>      | <b>0.780</b> | <b>13.4</b>                    | <b>53.0</b> | <b>5.52</b> |
| PTB7-Th: T-FPDI  | 0.25% DIO         |                | 0.773        | 13.6                           | 51.5        | 5.39        |
| PTB7-Th: T-FPDI  | 0.5% DIO          |                | 0.769        | 13.9                           | 51.2        | 5.48        |
| PTB7-Th: T-FPDI  | 1% DIO            |                | 0.770        | 13.1                           | 50.7        | 5.13        |
| PTB7-Th: T-FPDI  | 3% DIO            |                | 0.780        | 12.6                           | 47.8        | 4.68        |
| PTB7-Th: TT-FPDI | <b>none</b>       | <b>92</b>      | <b>0.791</b> | <b>14.4</b>                    | <b>62.9</b> | <b>7.17</b> |
| PTB7-Th: TT-FPDI | 0.25% DIO         |                | 0.777        | 14.6                           | 58.9        | 6.69        |
| PTB7-Th: TT-FPDI | 0.5% DIO          |                | 0.790        | 15.2                           | 57.2        | 6.87        |
| PTB7-Th: TT-FPDI | 1% DIO            |                | 0.787        | 13.8                           | 55.6        | 6.06        |
| PTB7-Th: TT-FPDI | 3% DIO            |                | 0.782        | 13.1                           | 53.8        | 5.48        |
| PTB7-Th: FT-PDI  | <b>none</b>       | <b>95</b>      | <b>0.805</b> | <b>14.4</b>                    | <b>58.2</b> | <b>6.75</b> |
| PTB7-Th: FT-PDI  | 0.25% DIO         |                | 0.800        | 14.8                           | 56.4        | 6.67        |
| PTB7-Th: FT-PDI  | 0.5% DIO          |                | 0.808        | 14.4                           | 54.4        | 6.34        |
| PTB7-Th: FT-PDI  | 1% DIO            |                | 0.811        | 13.3                           | 52.8        | 5.67        |
| PTB7-Th: FT-PDI  | 3% DIO            |                | 0.810        | 12.1                           | 53.5        | 5.24        |
| PTB7-Th: FTT-PDI | <b>none</b>       | <b>98</b>      | <b>0.822</b> | <b>16.5</b>                    | <b>56.4</b> | <b>7.66</b> |
| PTB7-Th: FTT-PDI | 0.25% DIO         |                | 0.819        | 17.1                           | 54.2        | 7.58        |
| PTB7-Th: FTT-PDI | 0.5% DIO          |                | 0.820        | 15.5                           | 58.1        | 7.37        |
| PTB7-Th: FTT-PDI | 1% DIO            |                | 0.811        | 14.0                           | 55.7        | 6.33        |
| PTB7-Th: FTT-PDI | 3% DIO            |                | 0.820        | 13.18                          | 54.3        | 5.87        |

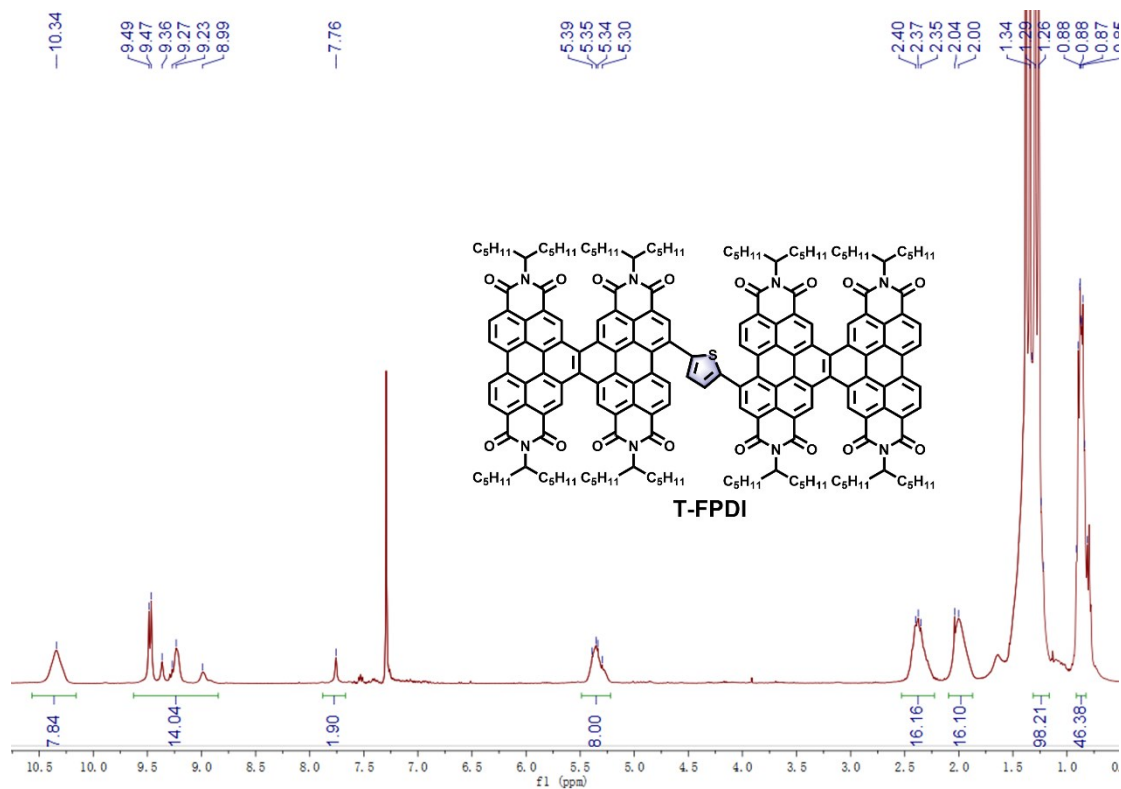

Fig. S3 The  $^1\text{H}$  NMR spectra of T-FPDI.

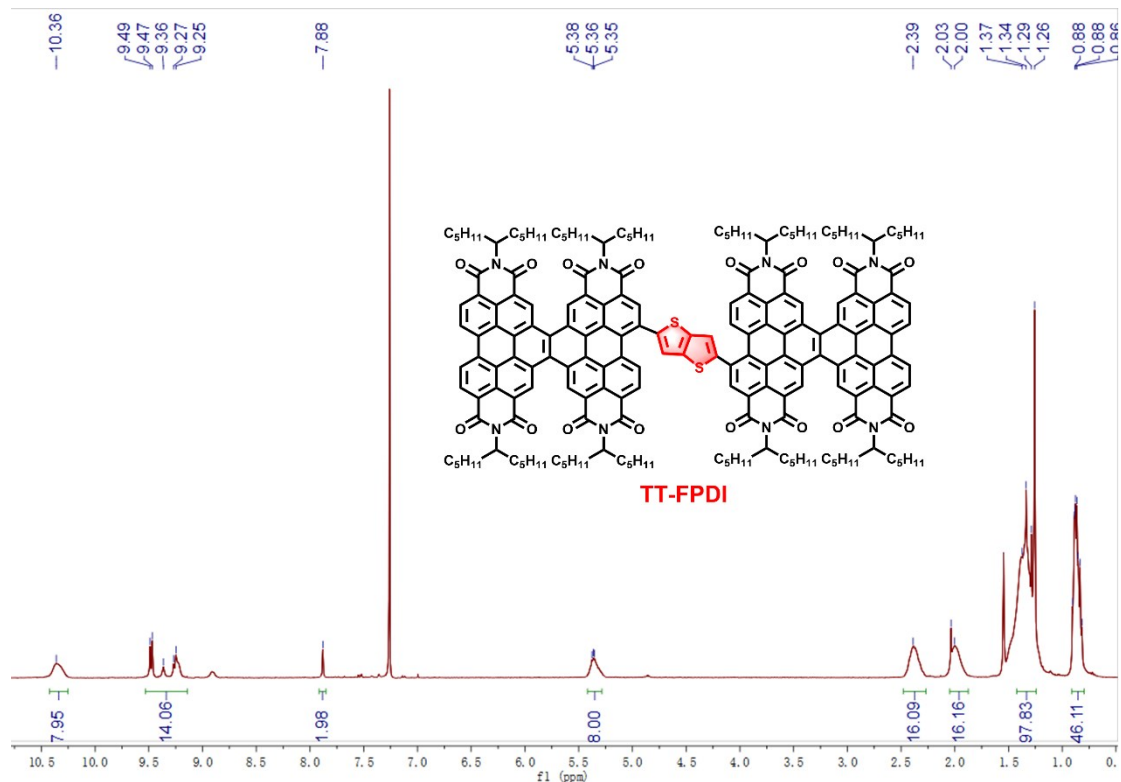

Fig. S4 The  $^1\text{H}$  NMR spectra of TT-FPDI.



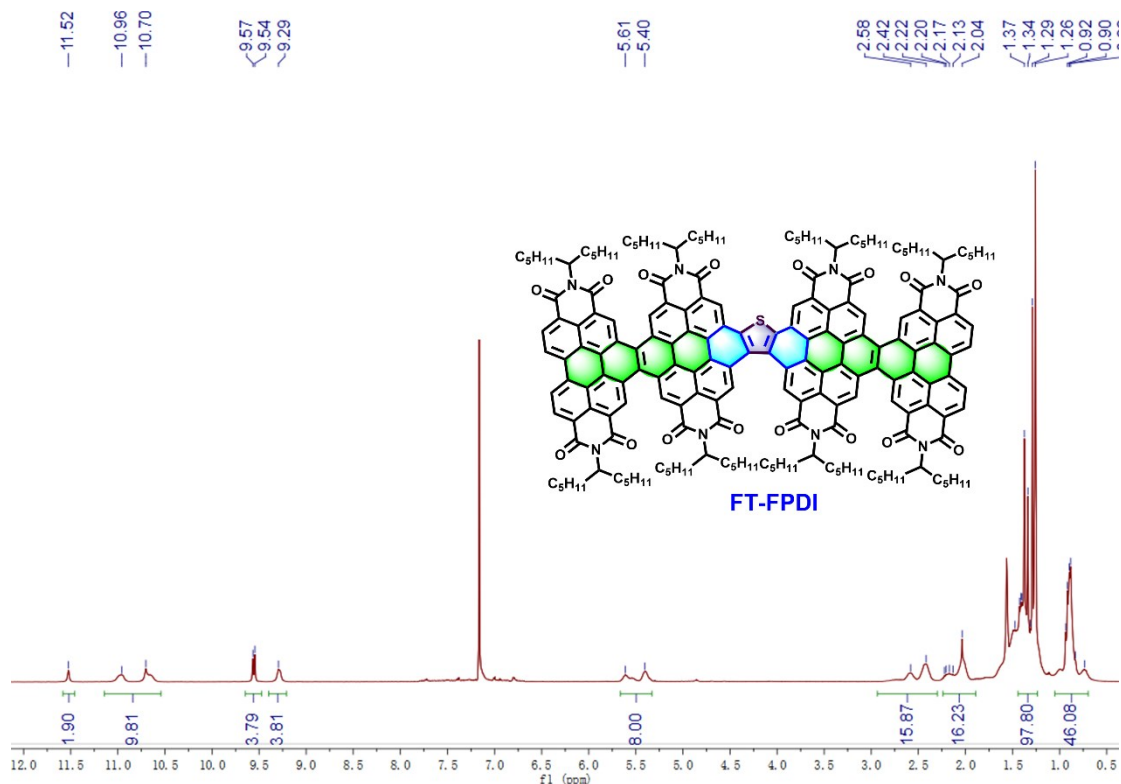

**Fig. S5** The <sup>1</sup>H NMR spectra of FT-FPDI.

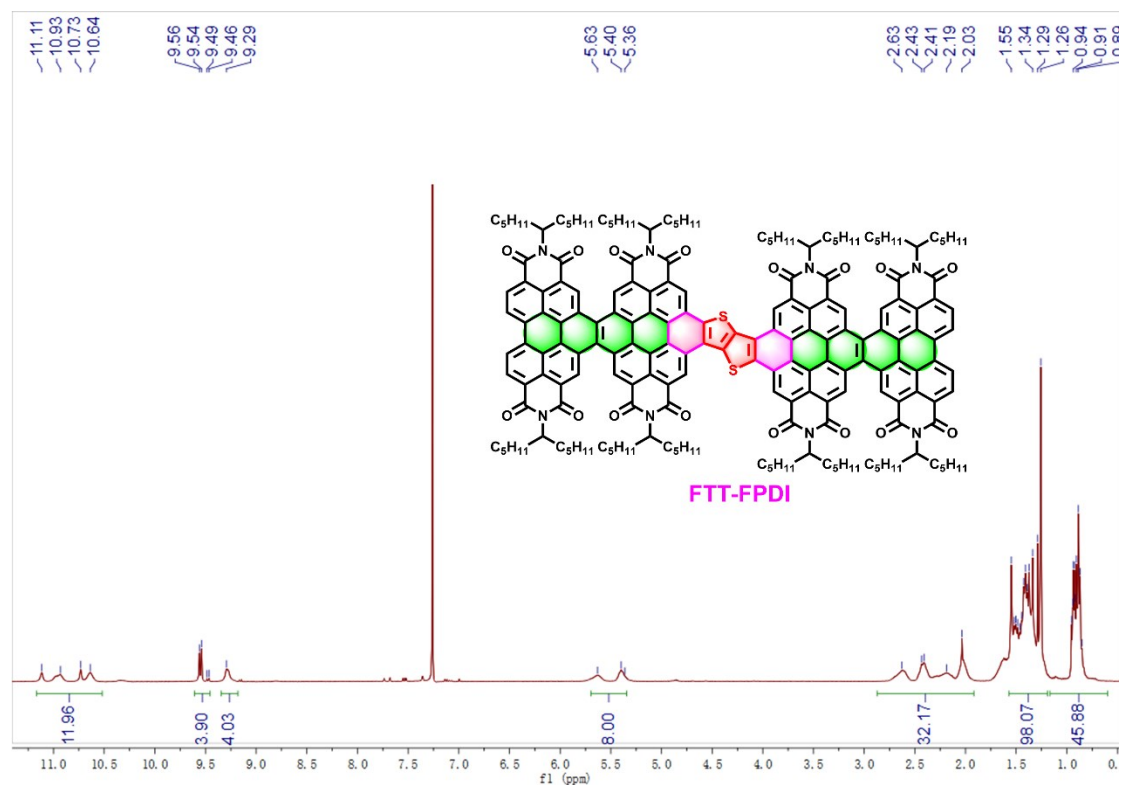

**Fig. S6** The <sup>1</sup>H NMR spectra of FTT-FPDI.

## References

1. M. Liu, J. Yang, Y. Yin, Y. Zhang, E. Zhou, F. Guo and L. Zhao, Novel Perylene Diimide-Based Polymers with Electron-Deficient Segments as the Comonomer for Efficient All-Polymer Solar Cells, *J. Mater. Chem. A*, 2018, **6**, 414-422.
2. M. Liu, J. Yang, C. Lang, Y. Zhang, E. Zhou, Z. Liu, F. Guo and L. Zhao, Fused Perylene Diimide-Based Polymeric Acceptors for Efficient All-Polymer Solar Cells, *Macromolecules*, 2017, **50**, 7559-7566.
